# Supplementary material for: Whole exome sequencing identifies novel variants of PIK3CA and validation of hotspot mutation by droplet digital PCR in breast cancer among Indian population
Source: PubMed Central journal article supplement (PMC10568783; doi:10.1186/s12935-023-03075-6), 2023-10-11
Supplement: 12935_2023_3075_MOESM1_ESM.pdf [file 12935_2023_3075_MOESM1_ESM.pdf]

## **Supplementary materials**

### **Whole exome sequencing identifies novel variants of PIK3CA and validation of hotspot mutation by droplet digital PCR in Breast cancer among Indian Population.**

Rahul Kumar<sup>1</sup>, Rakesh Kumar<sup>1</sup>, Harsh Goel<sup>1</sup>, Sonu Kumar<sup>2</sup>, Somorjit Singh Ningombam<sup>1</sup>, Imran Haider<sup>1</sup>, Usha Agrawal<sup>3</sup>, SVS Deo<sup>1</sup>, Ajay Gogia<sup>1</sup>, Atul Batra<sup>1</sup>, Ashok Sharma<sup>4</sup>, Sandeep Mathur<sup>5</sup>, Amar Ranjan<sup>1</sup>, Anita Chopra<sup>1</sup>, Showket Hussain<sup>6</sup>, Pranay Tanwar<sup>1\*</sup>

<sup>1</sup>Dr B. R. A.-Institute Rotary Cancer Hospital, All India Institute of Medical Sciences, New Delhi, India

<sup>2</sup>Department of Gastroenterology & HNU, All India Institute of Medical Sciences, New Delhi, India

<sup>3</sup>National Institute of Pathology, New Delhi, India

<sup>4</sup>Department of Biochemistry, All India Institute of Medical Sciences, New Delhi, India

<sup>5</sup>Department of Pathology, All India Institute of Medical Sciences, New Delhi, India

<sup>6</sup>Division of Molecular Oncology, National Institute of Cancer Prevention and Research, Noida, India

\*Correspondence: pranaytanwar@aiims.edu

**Running title**–Mutational landscape of PIK3CA in breast cancer.

**Total supplementary figures : 6**

**Total supplementary tables : 5**

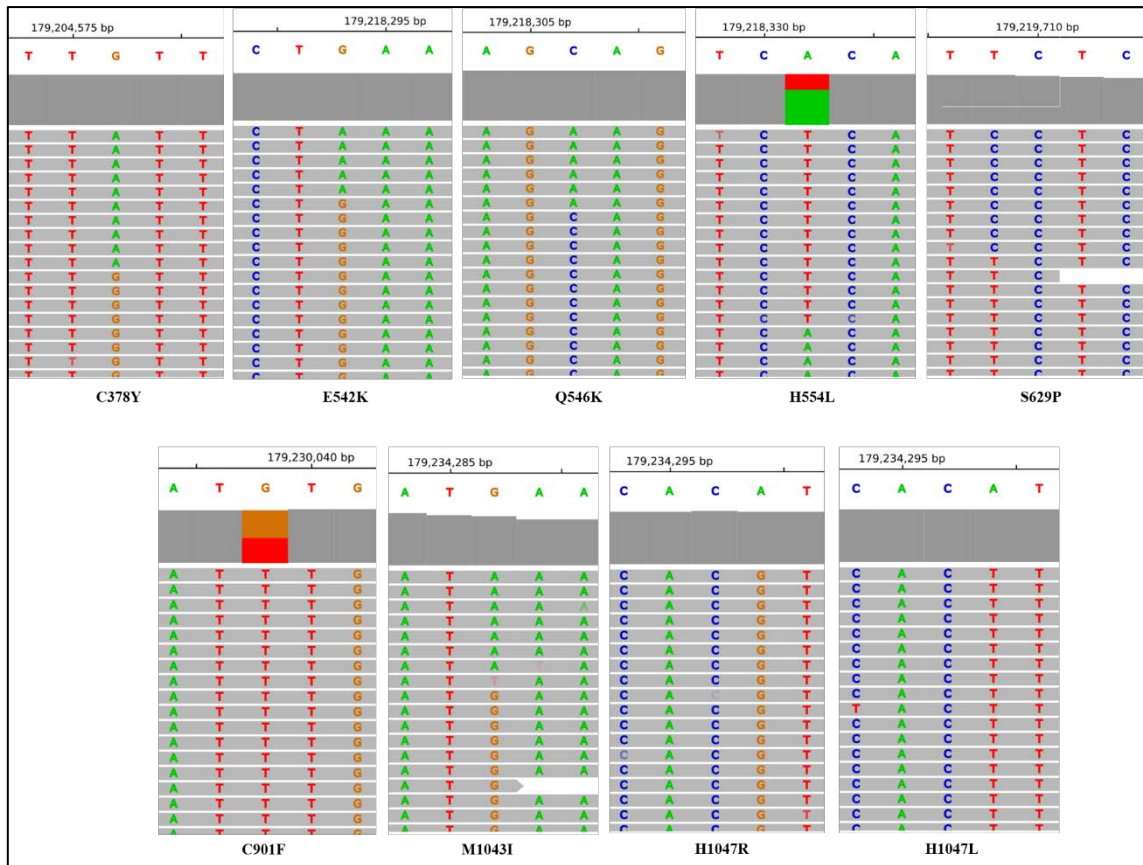

**Fig. S1** Visualization of integrated genomic mutant reads (A) C378Y, (B) E542K, (C) Q546K, (D) H554L, (E) S629P, (F) C901F, (G) H1047R, (H) H1047R and (I) M1043I were accomplished by Integrative genomic viewer (IGV).

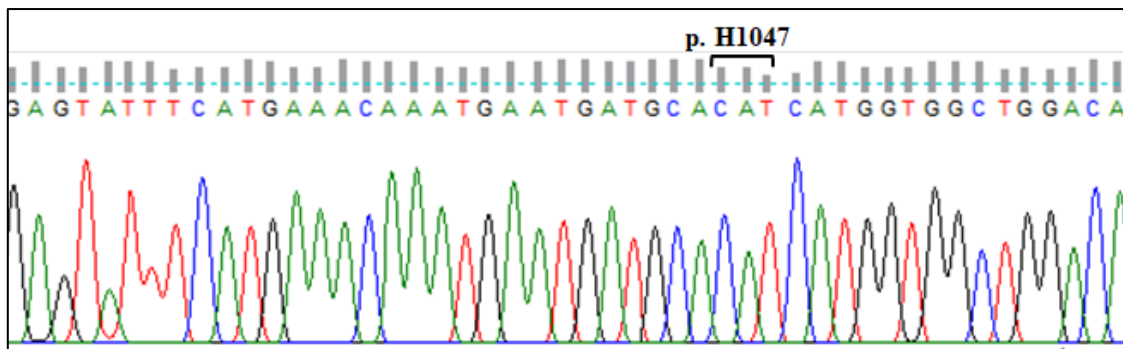

**Fig. S2** Detection of H1047R by performing Sanger sequencing. H1047R missense mutation was not detected in breast cancer cases when compared with the reference genome due to low variant frequency.

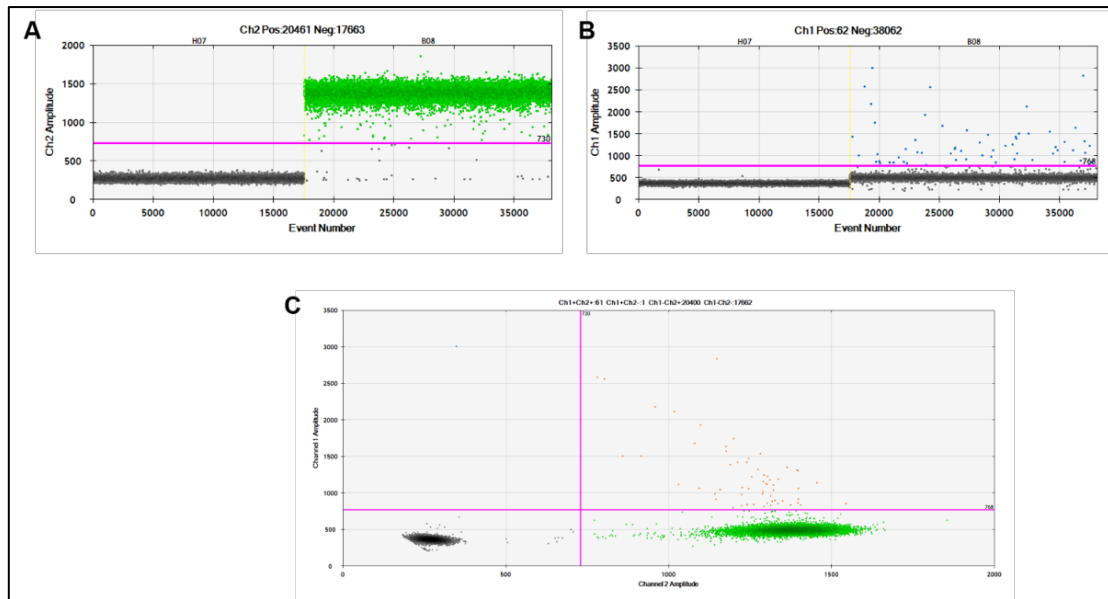

**Fig. S3** Single plex ddPCR assay for identification of PIK3CA wild type and mutant. Tumor DNA of BC (A) mutant probe labelled with FAM fluorophore, (B) wild probe labelled with HEX fluorophore and (C) 2D cluster plot of rare event detection in which channel 1 mutant probe plotted against channel 2 wild probe.

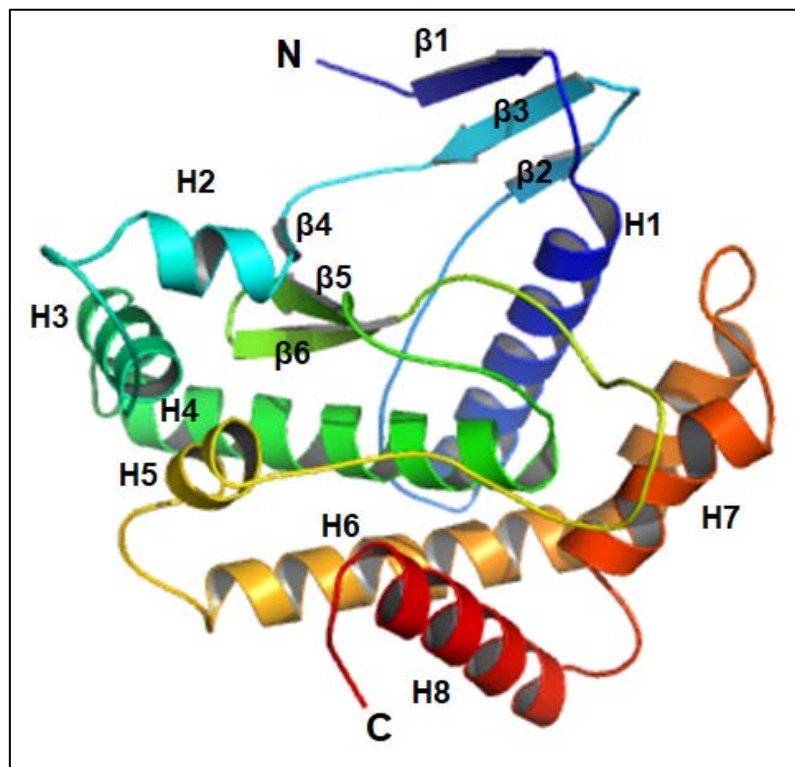

**Fig. S4** Tertiary structure of kinase domain of PIK3. Both N and C-terminals are indicated and helix and sheet numbers are labelled as H and  $\beta$  symbols. Structure is displayed in publication cartoon mode and rendered in PyMOL graphical system.

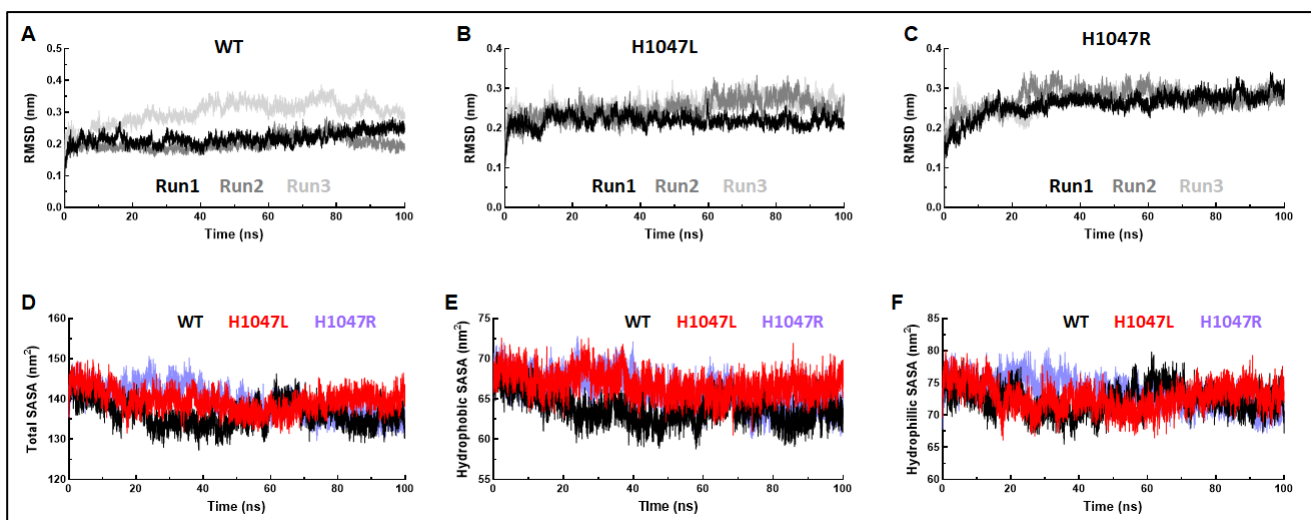

**Fig. S5** Root mean square deviation of (A) WT, (B) H1047L and (C) H1047R, Solvent accessible surface area with (D) Total SASA, (E) Hydrophobic SASA and (F) Hydrophilic SASA. MD simulation is performed in triplicates and WT, H1047L and H1047R MTs were labelled in black, red and blue lines, respectively.

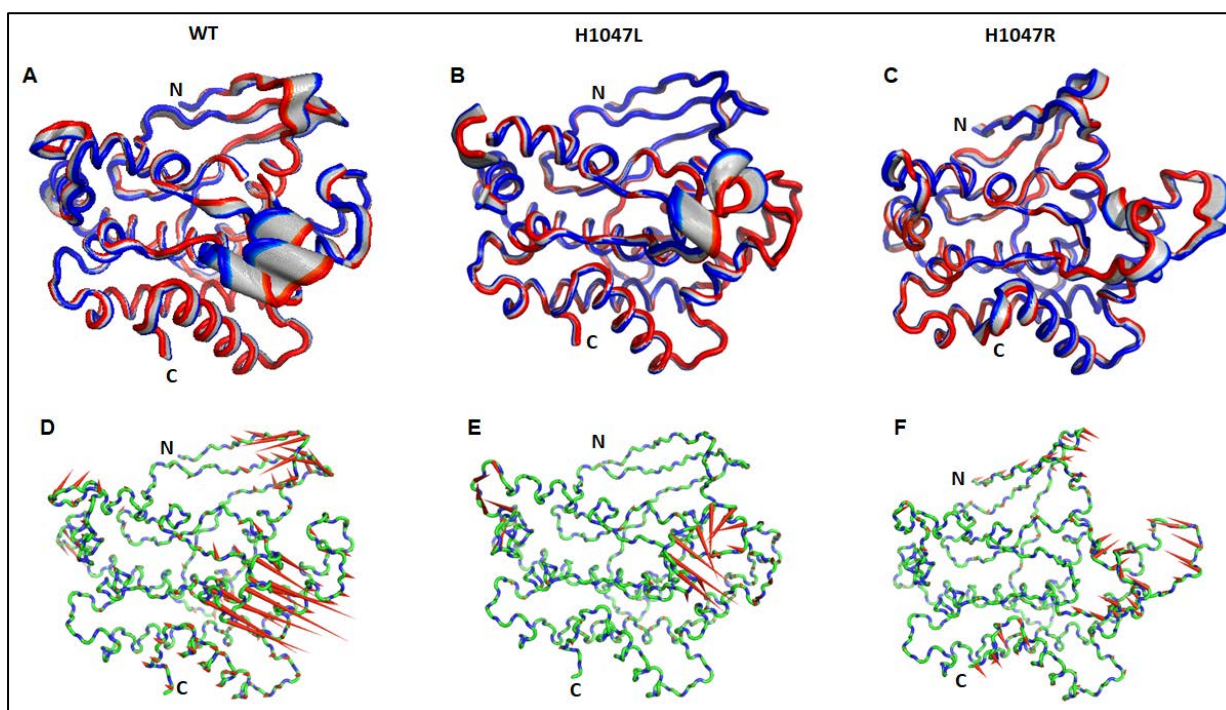

**Fig. S6** Collective mode of motions of (A) WT, (B) H1047L and (C) H1047R (upper panel) with corresponding porcupine structure in lower panel (D-F). All structures are generated in PyMOL graphical system. Red and blue regions in upper panel structures indicated minimum and maximum motions, respectively. In porcupine structure, the cone and length indicated the direction and amplitude of motions. Both N- and C-terminals are indicated in all 3D structures.

**Table S1.** Primers for PCR and qRT-PCR

| Gene   | Forward Primer         | Reverse Primer        |
|--------|------------------------|-----------------------|
| PIK3CA | CTGAGCAAGAGGCTTTGGAGTA | CAATCGGTCTTTGCCTGCTGA |

**Table S2.** Assay ID for ddPCR

|                        | DDPCR assay ID    | COSMIC ID    |
|------------------------|-------------------|--------------|
| PIK3CA WT for p.H1047R | dHsaMDW5225715853 | COSV55873195 |
| PIK3CA p.H1047R        | dHsaMDM5225715851 | COSV55873195 |

**Table S3.** Functional annotation of PIK3CA variants

| Variants | MutPred2 score | Molecular consequences        | Probability | P-value |
|----------|----------------|-------------------------------|-------------|---------|
| C378Y    | 0.893          | Altered Ordered interface     | 0.36        | 3.3e-03 |
|          |                | Gain of Strand                | 0.30        | 2.3e-03 |
|          |                | Altered Transmembrane protein | 0.11        | 0.03    |
| E542K    | 0.729          | Loss of Loop                  | 0.27        | 0.03    |
| Q546K    | 0.833          | -                             | -           | -       |
| H554L    | 0.830          | -                             | -           | -       |
| S629P    | 0.818          | Loss of Helix                 | 0.27        | 0.04    |
| C901F    | 0.971          | Altered Metal binding         | 0.40        | 6.5e-03 |
|          |                | Gain of Strand                | 0.27        | 0.03    |
|          |                | Altered Transmembrane protein | 0.19        | 6.3e-03 |
|          |                | Loss of Catalytic site        | 0.18        | 0.02    |
| M1043I   | 0.815          | Altered Metal binding         | 0.21        | 0.03    |
|          |                | Altered Transmembrane protein | 0.13        | 0.02    |
| H1047R   | 0.831          | Altered Ordered interface     | 0.31        | 0.02    |
|          |                | Altered Metal binding         | 0.28        | 5.3e-03 |
|          |                | Altered DNA binding           | 0.23        | 9.5e-03 |
|          |                | Altered Transmembrane protein | 0.21        | 4.0e-03 |
| H1047L   | 0.870          | Altered Metal binding         | 0.28        | 5.8e-03 |
|          |                | Altered Transmembrane protein | 0.23        | 2.7e-03 |
|          |                | Altered DNA binding           | 0.18        | 0.03    |
| Variants | MutPred2 score | Molecular consequences        | Probability | P-value |
| C378Y    | 0.893          | Altered Ordered interface     | 0.36        | 3.3e-03 |
|          |                | Gain of Strand                | 0.30        | 2.3e-03 |
|          |                | Altered Transmembrane protein | 0.11        | 0.03    |
| E542K    | 0.729          | Loss of Loop                  | 0.27        | 0.03    |
| Q546K    | 0.833          | -                             | -           | -       |
| H554L    | 0.830          | -                             | -           | -       |
| S629P    | 0.818          | Loss of Helix                 | 0.27        | 0.04    |
| C901F    | 0.971          | Altered Metal binding         | 0.40        | 6.5e-03 |
|          |                | Gain of Strand                | 0.27        | 0.03    |

|        |       |                               |      |         |
|--------|-------|-------------------------------|------|---------|
|        |       | Altered Transmembrane protein | 0.19 | 6.3e-03 |
|        |       | Loss of Catalytic site        | 0.18 | 0.02    |
| M1043I | 0.815 | Altered Metal binding         | 0.21 | 0.03    |
|        |       | Altered Transmembrane protein | 0.13 | 0.02    |
| H1047R | 0.831 | Altered Ordered interface     | 0.31 | 0.02    |
|        |       | Altered Metal binding         | 0.28 | 5.3e-03 |
|        |       | Altered DNA binding           | 0.23 | 9.5e-03 |
|        |       | Altered Transmembrane protein | 0.21 | 4.0e-03 |
| H1047L | 0.870 | Altered Metal binding         | 0.28 | 5.8e-03 |
|        |       | Altered Transmembrane protein | 0.23 | 2.7e-03 |
|        |       | Altered DNA binding           | 0.18 | 0.03    |

**Table S4.** Pathogenicity prediction of variant of unknown significance

| Variants | Predict SNP | FATHMM | SNPs&GO | Mutation assessor | Mutation Taster |
|----------|-------------|--------|---------|-------------------|-----------------|
| C378Y    | Neutral     | Cancer | Disease | Medium            | Disease         |
| H554L    | Neutral     | Cancer | Neutral | Neutral           | Disease         |
| S629P    | Deleterious | Cancer | Disease | Medium            | Disease         |

**Table S5.** Cosine content values for first 3 PCs

|               |     | 1-25       | 26-50     | 51-75      | 76-100    |
|---------------|-----|------------|-----------|------------|-----------|
| <b>WT</b>     | PC1 | 0.0452676  | 0.0360703 | 0.41195    | 0.210914  |
|               | PC2 | 0.174698   | 0.138471  | 0.573618   | 0.430119  |
|               | PC3 | 0.342793   | 0.0150176 | 0.00860085 | 0.0302362 |
| <b>H1047R</b> | PC1 | 0.0664025  | 0.518629  | 0.00544277 | 0.0145975 |
|               | PC2 | 0.441048   | 0.0448567 | 0.493826   | 1.14E-05  |
|               | PC3 | 0.00382353 | 0.315541  | 0.0803878  | 0.025208  |
| <b>H1047L</b> | PC1 | 0.0354101  | 0.303033  | 0.0458024  | 0.0312635 |
|               | PC2 | 0.0201197  | 1.73E-01  | 0.223455   | 0.0660624 |
|               | PC3 | 0.298651   | 0.613113  | 0.593642   | 0.384831  |
